# Supplementary material for: Системный анализ и разработка многоцелевого роботизированного комплекса блокирующего интрамедуллярного остеосинтеза
Source: HighWire-hosted journal article supplement (doi:10.1136/heartjnl-2013-303640), 2008-01-01
Supplement: heartjnl-2013-303640supp2.xls [file heartjnl-2013-303640supp2.xls]

## Sheet: SMART risk score
SMART Risk Score - Calculation Sheet
JAN Dorresteijn, FLJ Visseren, AMJ Wassink, MJA Gondrie, EW Steyerberg, PM Ridker, NR Cook, Y van der Graaf, on behalf of the SMART Study Group
Development and validation of a prediction rule for recurrent vascular events based on a cohort study of patients with arterial disease: the SMART risk score
10-Year Risk For Recurrent Cardiovascular Events	NA
Age		Years
Gender
Current Smoking
Systolic Blood Pressure		mmHg
Medical History:
Diabetes Mellitus
Coronary Artery Disease
Cerebrovascular Disease
Abdominal Aortic Aneurysm
Peripheral Artery Disease
Time since first diagnosis of Cardiovascular Disease		Years
Laboratory Results:
HDL-cholesterol		mmol/L	or		mg/dL
Total cholesterol		mmol/L	or		mg/dL
eGFR		mL/min
High-sensitivity CRP		mg/dL

## Sheet: Blad2
Gender	Female
	Male
Current Smoking	No
	Yes
Diabetes Mellitus	No
	Yes
Coronary Artery Disease	No
	Yes
Cerebrovascular Disease	No
	Yes
Abdominal Aortic Aneurysm	No
	Yes
Peripheral Artery Disease	No
	Yes
Linear predictor	2.09873
Condition 1 through 7	999
Condition 8 through 14	999
